# Supplementary material for: Effects of Primary Aldosteronism and Different Therapeutic Modalities on Glucose Metabolism
Source: MDPI journal article supplement (doi:10.3390/jcm8122194), 2019-12-12
Supplement: s1 [file s1]

# Effects of Primary Aldosteronism and Different Therapeutic Modalities on Glucose Metabolism

Mi Kyung Kwak <sup>1</sup>, Jee Yang Lee <sup>2</sup>, Beom-Jun Kim <sup>2</sup>, Seung Hun Lee <sup>2,\*</sup> and Jung-Min Koh<sup>2,\*</sup>

<sup>1</sup> Division of Endocrinology and Metabolism, Hallym University Dongtan Sacred Heart Hospital, Dongtan, 7, Keunjaebong-gil, Hwaseong, Gyeonggi-do, 18450, Republic of Korea; creamtea38@gmail.com (M.K.K.)

<sup>2</sup> Division of Endocrinology and Metabolism, Asan Medical Center, University of Ulsan College of Medicine, 88, Olympic-ro 43-gil, Songpa-gu, Seoul 05505, Korea; asanmedicalamc@gmail.com (J.Y.L.); umkbj0825@amc.seoul.kr (B-J.K.); hun0108@amc.seoul.kr (S.H.L.); jmkoh@amc.seoul.kr (J-M.K.)

\* Correspondence: hun0108@amc.seoul.kr; Tel.: +82-2-3010-5666 (S.H.L.); jmkoh@amc.seoul.kr; Tel.: +82-2-3010-3247 (J-M.K.)

The Supplemental data includes Tables S1-S6 and Figure S1.

**Table S1.** Glucose status in patients with PA without SH and matched controls.

|                      | Matched control (N = 609) | PA without SH (N = 245) | <i>p</i>         |
|----------------------|---------------------------|-------------------------|------------------|
| Pre-diabetes, N (%)  | <b>173 (24.7%)</b>        | <b>90 (36.7%)</b>       | <b>0.002</b>     |
| DM, N (%)            | <b>90 (12.9%)</b>         | <b>46 (18.8%)</b>       | <b>0.024</b>     |
| Hyperglycemia, N (%) | <b>263 (37.6%)</b>        | <b>136 (55.5%)</b>      | <b>&lt;0.001</b> |

Up to three controls were enrolled per participant with PA. They were individually matched for sex, age ( $\pm 1$  year), and BMI ( $\pm 0.5$  kg/m<sup>2</sup>). The hyperglycemia was defined as DM or pre-diabetes.

Significant results ( $p < 0.05$ ) are indicated in bold.

BMI, body mass index; DM, diabetes mellitus; PA, primary aldosteronism; SH, subclinical hypercortisolism.

**Table S2.** Glucose status in drug-naïve patients with PA and matched controls.

|                  | Matched control<br>(N = 225) | PA<br>(N = 81)     | <i>p</i>         | Matched control<br>(N = 205) | PA without SH<br>(N = 73) | <i>p</i>         |
|------------------|------------------------------|--------------------|------------------|------------------------------|---------------------------|------------------|
| FPG (mg/dL)      | 103.5 ± 25.5                 | 102.2 ± 14.9       | 0.672            | 103.2 ± 25.8                 | 101.3 ± 14.0              | 0.560            |
| Insulin (pmol/L) | <b>10.2 ± 5.7</b>            | <b>7.3 ± 4.3</b>   | <b>&lt;0.001</b> | <b>10.3 ± 5.8</b>            | <b>7.3 ± 4.4</b>          | <b>&lt;0.001</b> |
| HOMA-β           | <b>108.1 ± 63.9</b>          | <b>74.9 ± 52.8</b> | <b>&lt;0.001</b> | <b>109.6 ± 65.5</b>          | <b>76.1 ± 54.3</b>        | <b>&lt;0.001</b> |
| HOMA-IR          | <b>2.6 ± 1.6</b>             | <b>1.9 ± 1.2</b>   | <b>&lt;0.001</b> | <b>2.6 ± 1.7</b>             | <b>1.9 ± 1.3</b>          | <b>&lt;0.001</b> |

Up to three controls were enrolled per participant with PA. They were individually matched for sex, age ( $\pm 1$  year), and BMI ( $\pm 0.5$  kg/m<sup>2</sup>).

Significant results ( $p < 0.05$ ) are indicated in bold. Data are expressed as the mean  $\pm$  standard deviation.

FPG, fasting plasma glucose; HOMA-β, homeostasis model assessment-β-cell function index; HOMA-IR, homeostasis model assessment-insulin resistance index; PA, primary aldosteronism; SH, subclinical hypercortisolism

**Table S3.** The association of PRA, PAC, ARR, or PAC after SIT with HOMA-IR and HOMA- $\beta$  in drug-naïve patients with PA

| Variable               | HOMA- $\beta$ (N = 81) |               |                   |              | HOMA-IR (N =81) |              |               |              |
|------------------------|------------------------|---------------|-------------------|--------------|-----------------|--------------|---------------|--------------|
|                        | $\beta^*$              | SE            | Beta <sup>†</sup> | <i>p</i>     | $\beta$         | SE           | Beta          | <i>p</i>     |
| PRA (ng/mL/h)          |                        |               |                   |              |                 |              |               |              |
| Model 1                | 0.533                  | 7.280         | 0.008             | 0.942        | 0.195           | 0.167        | 0.130         | 0.248        |
| Model 2                | -1.506                 | 7.076         | -0.023            | 0.832        | 0.120           | 0.154        | 0.080         | 0.438        |
| Model 3                | -1.668                 | 7.190         | -0.026            | 0.817        | 0.120           | 0.157        | 0.080         | 0.447        |
| PAC (ng/dL)            |                        |               |                   |              |                 |              |               |              |
| Model 1                | -25.980                | 13.486        | -0.212            | 0.058        | <b>-0.760</b>   | <b>0.309</b> | <b>-0.267</b> | <b>0.016</b> |
| Model 2                | -23.041                | 12.885        | -0.188            | 0.078        | <b>-0.666</b>   | <b>0.278</b> | <b>-0.234</b> | <b>0.019</b> |
| Model 3                | -22.718                | 13.360        | -0.185            | 0.093        | <b>-0.672</b>   | <b>0.288</b> | <b>-0.236</b> | <b>0.023</b> |
| ARR, (ng/dL)/(ng/mL/h) |                        |               |                   |              |                 |              |               |              |
| Model 1                | -5.344                 | 6.005         | -0.100            | 0.376        | <b>-0.280</b>   | <b>0.136</b> | <b>-0.225</b> | <b>0.044</b> |
| Model 2                | -3.547                 | 5.840         | -0.066            | 0.545        | -0.215          | 0.126        | -0.172        | 0.092        |
| Model 3                | -3.207                 | 5.939         | -0.060            | 0.591        | -0.211          | 0.128        | -0.169        | 0.104        |
| PAC after SIT (ng/dL)  |                        |               |                   |              |                 |              |               |              |
| Model 1                | <b>-37.039</b>         | <b>15.318</b> | <b>-0.281</b>     | <b>0.018</b> | -0.436          | 0.350        | -0.149        | 0.217        |
| Model 2                | <b>-47.038</b>         | <b>14.584</b> | <b>-0.357</b>     | <b>0.002</b> | -0.631          | 0.333        | -0.217        | 0.063        |
| Model 3                | <b>-49.367</b>         | <b>15.181</b> | <b>-0.375</b>     | <b>0.002</b> | -0.643          | 0.349        | -0.221        | 0.070        |

\*Non-standardized coefficient. †Standardized coefficient.

The Enter method was applied to this model.

Significant results ( $P < 0.05$ ) are indicated in bold. PRA, PAC, ARR, and PAC after SIT were log-transformed because of their skewed distributions.

Model 1: unadjusted model; Model 2: adjusted for sex, age, and BMI; Model 3: adjusted for current smoking status, alcohol intake ( $\geq 3$  units/day), and regular outdoor exercise ( $\geq 30$  min/day), in addition to the variables included in Model 2.

ARR, PAC/PRA ratio; BMI, body mass index; HOMA- $\beta$ , homeostasis model assessment- $\beta$ -cell function index; HOMA-IR, homeostasis model assessment-insulin resistance index; PA, primary aldosteronism; PAC, plasma aldosterone concentration; PRA, plasma renin activity; SIT, saline infusion test.

**Table S4.** Baseline characteristics of patients with PA, classified according to therapy.

|                                           | ADX (N = 178)                       | MRA (N = 108)                       | <i>p</i>         |
|-------------------------------------------|-------------------------------------|-------------------------------------|------------------|
| Men, N (%)                                | 84 (47.2%)                          | 61 (56.5%)                          | 0.161            |
| Age (years), mean $\pm$ SD                | 52.4 $\pm$ 10.5                     | 54.9 $\pm$ 11.5                     | 0.063            |
| BMI (kg/m <sup>2</sup> ), mean $\pm$ SD   | 25.5 $\pm$ 3.4                      | 25.7 $\pm$ 4.1                      | 0.680            |
| Current smoker, N (%)                     | 29 (16.3%)                          | 23 (21.3%)                          | 0.365            |
| Alcohol intake $\geq$ 3 U/day, N (%)      | 26 (14.6%)                          | 23 (21.3%)                          | 0.196            |
| Regular exercise $\geq$ 30 min/day, N (%) | <b>23 (12.9%)</b>                   | <b>28 (25.9%)</b>                   | <b>0.009</b>     |
| SBP (mmHg), mean $\pm$ SD                 | 140.3 $\pm$ 18.2                    | 139.3 $\pm$ 19.0                    | 0.653            |
| DBP (mmHg), mean $\pm$ SD                 | 86.9 $\pm$ 12.2                     | 85.1 $\pm$ 11.8                     | 0.221            |
| Hypertension, N (%)                       | 178 (100.0%)                        | 108 (100.0%)                        | >0.999           |
| K <sup>+</sup> (mEq/L), mean $\pm$ SD     | <b>3.6 <math>\pm</math> 0.6</b>     | <b>4.3 <math>\pm</math> 2.3</b>     | <b>0.003</b>     |
| Creatinine (mg/dL), mean $\pm$ SD         | 0.8 $\pm$ 0.2                       | 0.8 $\pm$ 0.2                       | 0.767            |
| eGFR (mL/min), mean $\pm$ SD              | 97.1 $\pm$ 30.6                     | 97.4 $\pm$ 29.6                     | 0.944            |
| PRA (ng/mL/h) , mean $\pm$ SD             | 0.4 $\pm$ 1.0                       | 0.9 $\pm$ 3.3                       | 0.096            |
| PAC (ng/dL), mean $\pm$ SD                | <b>38.1 <math>\pm</math> 25.4</b>   | <b>25.6 <math>\pm</math> 12.8</b>   | <b>&lt;0.001</b> |
| ARR, (ng/dL)/(ng/mL/h), mean $\pm$ SD     | <b>200.6 <math>\pm</math> 200.2</b> | <b>112.3 <math>\pm</math> 198.5</b> | <b>&lt;0.001</b> |
| PAC after SIT (ng/dL) , mean $\pm$ SD     | <b>25.4 <math>\pm</math> 18.4</b>   | <b>11.4 <math>\pm</math> 5.2</b>    | <b>&lt;0.001</b> |

Significant results ( $p < 0.05$ ) are indicated in bold. ADX, adrenalectomy; ARR, PAC/PRA ratio; BMI, body mass index; BP, blood pressure; DBP, diastolic blood pressure; GFR, glomerular filtration rate; MRA, mineralocorticoid receptor antagonist; PA, primary aldosteronism; PAC, plasma aldosterone concentration; PRA, plasma renin activity; SBP, systolic blood pressure; SIT, saline infusion test.

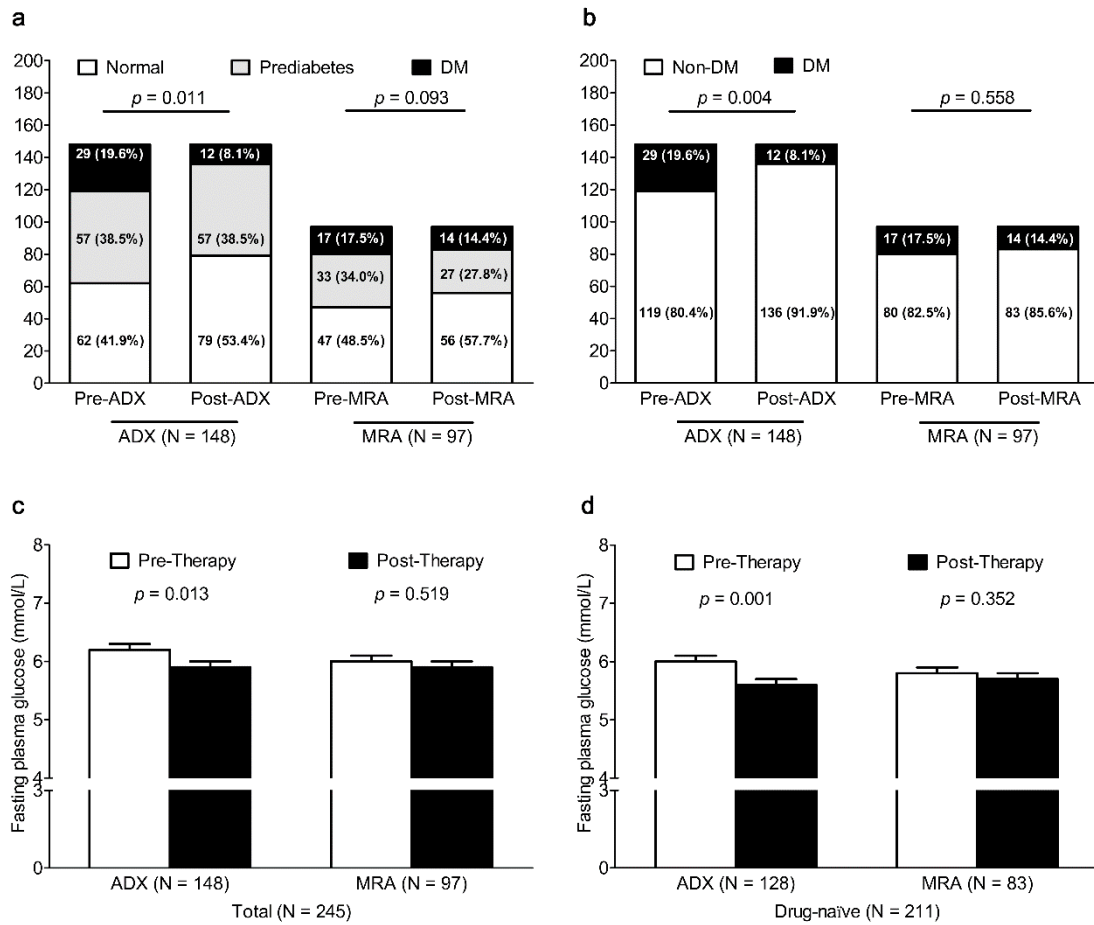

**Figure S1.** Change in glucose status and FPG in PA patients without SH after ADX or MRA therapy. Change in glucose status (normal, prediabetes, and DM in Figure S1a; non-DM and DM in Figure S1b) in PA patients without SH after ADX or MRA therapy. Change in FPG in PA patients without SH (Figure S1c) and that in anti-diabetic therapy naïve PA patients without SH (Figure S1d) after ADX or MRA therapy. ADX, adrenalectomy; DM, diabetes mellitus; FPG, fasting plasma glucose; MRA, mineralocorticoid receptor antagonist; SH, subclinical hypercortisolism

**Table S5.** Likelihood of improvement in glucose status following ADX vs. MRA therapy in PA patients with similar ranges of plasma aldosterone concentration, after an intravenous saline infusion test

|             | OR (95% CI)             | <i>p</i>     |
|-------------|-------------------------|--------------|
| Model 1     |                         |              |
| MRA therapy | Ref.                    |              |
| ADX         | <b>2.11 (1.17–3.82)</b> | <b>0.013</b> |
| Model 2     |                         |              |
| MRA therapy | Ref.                    |              |
| ADX         | <b>2.09 (1.14–3.82)</b> | <b>0.017</b> |
| Model 3     |                         |              |
| MRA therapy | Ref.                    |              |
| ADX         | <b>2.22 (1.20–4.13)</b> | <b>0.012</b> |
| Model 5     |                         |              |
| MRA therapy | Ref.                    |              |
| ADX         | <b>2.23 (1.16–4.27)</b> | <b>0.016</b> |

Significant results ( $p < 0.05$ ) are indicated in bold.

Model 1: unadjusted model; Model 2; adjusted for sex, age, and BMI; Model 3: adjusted for current smoking status, alcohol intake ( $\geq 3$  units/day), and regular outdoor exercise ( $\geq 30$  min/day), in addition to the variables included in Model 2; Model 5: adjusted for plasma aldosterone concentration after intravenous saline infusion test, in addition to the variables included in Model 3.

Improvement in glucose status was defined as a change in glucose status from diabetes mellitus to pre-diabetes or normal glucose tolerance, or from pre-diabetes to normal glucose tolerance, or by the reduction of anti-diabetic medication.

ADX; adrenalectomy, BMI; body mass index; MRA, mineralocorticoid receptor antagonist

**Table S6.** Likelihood of improvement in glucose status following ADX in unilateral PA patients vs. MRA therapy in bilateral PA patients

|             | OR (95% CI)             | <i>p</i>     |
|-------------|-------------------------|--------------|
| Model 1     |                         |              |
| MRA therapy | Ref.                    |              |
| ADX         | <b>1.81 (1.03–3.18)</b> | <b>0.038</b> |
| Model 2     |                         |              |
| MRA therapy | Ref.                    |              |
| ADX         | <b>1.81 (1.02–3.21)</b> | <b>0.043</b> |
| Model 3     |                         |              |
| MRA therapy | Ref.                    |              |
| ADX         | <b>1.90 (1.05–3.42)</b> | <b>0.033</b> |
| Model 5     |                         |              |
| MRA therapy | Ref.                    |              |
| ADX         | <b>1.99 (1.01–4.06)</b> | <b>0.049</b> |

Significant results ( $p < 0.05$ ) are indicated in bold.

Unilateral PA patients: 148 patients with unilateral APA and 20 patients with UAH

Bilateral PA patients: 66 patients with BAH and 10 patients with bilateral APA

Model 1: unadjusted model; Model 2; adjusted for sex, age, and BMI; Model 3: adjusted for current smoking status, alcohol intake ( $\geq 3$  units/day), and regular outdoor exercise ( $\geq 30$  min/day), in addition to the variables included in Model 2; Model 5: adjusted for plasma aldosterone concentration after intravenous saline infusion test, in addition to the variables included in Model 3.

Improvement in glucose status was defined as a change in glucose status from diabetes mellitus to pre-diabetes or normal glucose tolerance, or from pre-diabetes to normal glucose tolerance, or by the reduction of anti-diabetic medication.

ADX; adrenalectomy, APA, aldosterone-producing adenoma; BAH, bilateral adrenal hyperplasia; BMI; body mass index; MRA, mineralocorticoid receptor antagonist; UAH, unilateral adrenal hyperplasia
